# Supplementary material
Source: publisher figshare collection journal article supplement (https://geolsoc.figshare.com/ndownloader/files/28762886)
Supplement: Supplementary file 1 [file 28762886]

## Sheet: Plan1
	Long	Lat	Altitude	Lithofacies (see text)	Stratigraphic position
VEC-01	51° 34' 12''	29° 02' 50''	140m	Thin sandstones lenses and sand-dykes	Torres Fm.
VEC-03	51° 34' 26''	29° 02' 59''	151m	Heterolithic sandstones	Torres Fm.
VEC-30	52° 38' 32''	29° 31' 17''	367m	Tabular massive sandstones	Torres Fm.
VEC-31	52° 38' 05''	29° 33' 12''	162m	Tabular massive sandstones	Torres Fm.
VEC-37	52° 14' 15''	29° 19' 28''	132m	Thin sandstones sheets and sand-dykes	Torres Fm.
VN-14	52° 23' 03''	29° 41' 30''	123m	Tabular massive sandstones	Torres Fm.
VN-02	52° 37' 50''	29° 33' 57''	118m	Tabular massive sandstones	Torres Fm.
VEC-27	52° 38' 36''	29° 14' 59''	428m	Low-angle crossbedded sandstones	Palmas Fm.
VN-24	51° 34' 00''	29° 02' 10''	193m	Basaltic volcaniclastic	Torres Fm.
VN-26	51° 33' 00''	29° 01' 03''	160m	Basaltic volcaniclastic	Torres Fm.
VEC-48	51° 39' 33''	29° 27' 01''	122m	Basaltic volcaniclastic	Torres Fm.
VEC-12	51° 35' 25''	29° 57' 42''	128m	Usina Velha volcaniclastic	Palmas Fm. (?)
VN-10	50° 10' 50''	29° 22' 35''	512m	Sand-dykes (no interbedded sandstones)	Vale do Sol Fm.
VN-06	52° 39' 06''	29° 31' 06''	450m	Sand-dykes (no interbedded sandstones)	Vale do Sol Fm.
